# Supplementary material
Source: publisher site journal article supplement (https://neobiota.pensoft.net/article/61673/download/suppl/31/)
Supplement: Supplementary file 1

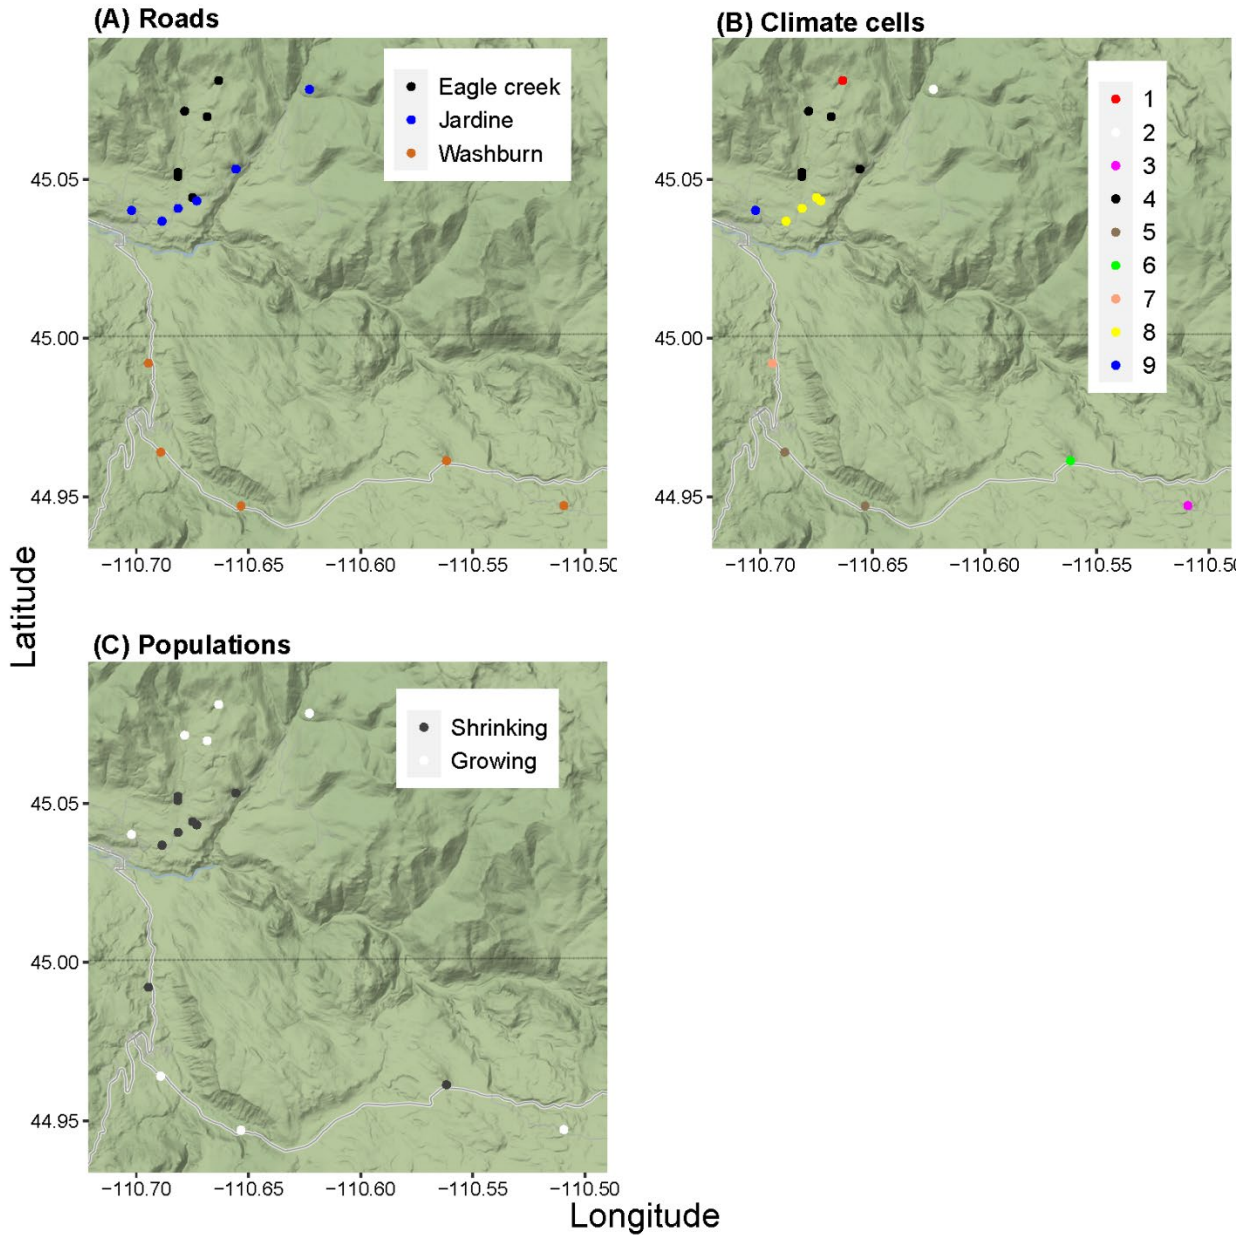

**Supplementary Figure 1.** Location of study sites (17) by (A) road, (B) climate cell, and (C) population grouping. Climate cells in (B) refer to those sites that are grouped according to the resolution of our gridded climate data. One site was removed due to construction, see methods. Maps were made using “ggmap” package (Kahle and Wickham 2013) in the statistical software R, version 3.6.0 (R Core Team 2019).

### References

Kahle D, Wickham H (2013) ggmap: Spatial Visualization with ggplot2. *The R journal* 5: 144-161. <http://journal.r-project.org/archive/2013-1/kahle-wickham.pdf>

R Core Team (2019) R: A language and environment for statistical computing. R foundation for statistical computing (Vienna, Austria).
